# Supplementary material for: Biomarkers of Endothelial Activation Are Associated with Poor Outcome in Critical Illness
Source: PubMed Central journal article supplement (PMC4619633; doi:10.1371/journal.pone.0141251), 2015-10-22
Supplement: pone.0141251.s001.pdf [file pone.0141251.s001.pdf]

**S1 Table. Correlation between Biomarkers**

|                                | <u>Inflammation:</u> |                   |                    |                    | <u>Endothelial Activation</u> |                   |
|--------------------------------|----------------------|-------------------|--------------------|--------------------|-------------------------------|-------------------|
|                                | IL-6                 | IL-8              | G-CSF              | sTNFR-1            | Ang-1                         | Ang-2             |
| <u>Inflammation:</u>           |                      |                   |                    |                    |                               |                   |
| IL-8                           | 0.42 <sup>a</sup>    |                   |                    |                    |                               |                   |
| G-CSF                          | 0.59 <sup>a</sup>    | 0.32 <sup>a</sup> |                    |                    |                               |                   |
| sTNFR-1                        | 0.51 <sup>a</sup>    | 0.49 <sup>a</sup> | 0.29 <sup>a</sup>  |                    |                               |                   |
| <u>Endothelial Activation:</u> |                      |                   |                    |                    |                               |                   |
| Ang-1                          | -0.18 <sup>a</sup>   | -0.02             | -0.16 <sup>a</sup> | -0.27 <sup>a</sup> |                               |                   |
| Ang-2                          | 0.39 <sup>a</sup>    | 0.24 <sup>a</sup> | 0.28 <sup>a</sup>  | 0.55 <sup>a</sup>  | -0.81 <sup>a</sup>            |                   |
| sVCAM-1                        | 0.21 <sup>a</sup>    | 0.35 <sup>a</sup> | 0.06               | 0.54 <sup>a</sup>  | -0.34 <sup>a</sup>            | 0.49 <sup>a</sup> |

Table shows Spearman's rank correlation coefficients between untransformed biomarker concentrations.

<sup>a</sup> P-value <0.001.
