# Supplementary material for: Biomarkers of Endothelial Activation Are Associated with Poor Outcome in Critical Illness
Source: PubMed Central journal article supplement (PMC4619633; doi:10.1371/journal.pone.0141251), 2015-10-22
Supplement: pone.0141251.s002.pdf [file pone.0141251.s002.pdf]

**S2 Table. Subject Characteristics Sepsis versus Sterile Inflammation**

| <b>Characteristics</b>       | <b>Sepsis (N = 629)</b> | <b>Sterile Inflammation<br/>(N = 314)</b> |
|------------------------------|-------------------------|-------------------------------------------|
| Patient Age, mean± SD        | 53.8 ± 15.5             | 58.6 ± 17.5                               |
| Male patients, no. (%)       | 416 (66.1%)             | 185 (58.9%)                               |
| Caucasian, no. (%)           | 629 (100%)              | 314 (100%)                                |
| Source of ICU admit, no. (%) |                         |                                           |
| Medical                      | 372 (59.1%)             | 144 (45.9%)                               |
| Surgical                     | 257 (40.9%)             | 170 (55.1%)                               |
| APACHE III, mean ± SD        | 54.0 ± 26.7             | 44.8 ± 24.1                               |
| Comorbidities, no. (%)       |                         |                                           |
| Diabetes                     | 169 (26.9%)             | 64 (20.4%)                                |
| Cirrhosis                    | 68 (10.8%)              | 16 (5.1%)                                 |
| Chronic Renal Insufficiency  | 45 (7.2%)               | 20 (6.4%)                                 |
| Smoking                      | 357 (56.8%)             | 181 (57.6%)                               |
| BMI, mean ± SD               | 31.2 ± 11.5             | 28.9 ± 8.0                                |

SD= Standard Deviation; APACHE III = Acute Physiology and Chronic Health Evaluation III; BMI = Body Mass Index
