# Supplementary material for: Biomarkers of Endothelial Activation Are Associated with Poor Outcome in Critical Illness
Source: PubMed Central journal article supplement (PMC4619633; doi:10.1371/journal.pone.0141251), 2015-10-22
Supplement: pone.0141251.s003.pdf [file pone.0141251.s003.pdf]

**S3 Table. Comparison of Plasma Biomarkers in Sepsis and Sterile Inflammation**

| <b>Biomarkers (pg/mL)</b> | <b>Subjects (N)</b> | <b>Sepsis, Median (IQR)</b> | <b>Sterile Inflammation, Median (IQR)</b> | <b>p<sup>a</sup></b>   |
|---------------------------|---------------------|-----------------------------|-------------------------------------------|------------------------|
| Inflammation:             |                     |                             |                                           |                        |
| IL-6                      | 888                 | 134 (63 ,330)               | 114 (47 ,287)                             | 0.016                  |
| IL-8                      | 888                 | 15 (8 ,33)                  | 12 (6 ,24)                                | 8.9 x10 <sup>-4</sup>  |
| G-CSF                     | 888                 | 28 (16 ,58)                 | 27 (16 ,51)                               | 0.37                   |
| sTNFR-1                   | 888                 | 9304 (5946 ,15531)          | 7120 (4791 ,13258)                        | 5.1 x10 <sup>-6</sup>  |
| Endothelial Activation:   |                     |                             |                                           |                        |
| Ang-1                     | 930                 | 4992 (2184 ,10070)          | 5624 (2996 ,9228)                         | 0.36                   |
| Ang-2                     | 939                 | 16405 (8600 ,33197)         | 9093 (5526 ,17093)                        | 1.3 x10 <sup>-17</sup> |
| Ang-2/Ang-1               | 930                 | 4 (1 ,13)                   | 2 (1 ,5)                                  | 8.2 x10 <sup>-09</sup> |
| sVCAM-1                   | 939                 | 601 (458 ,869)              | 494 (398 ,675)                            | 2.7 x10 <sup>-10</sup> |

IQR= Interquartile Range; IL-6 = Interleukin-6; IL-8 = Interleukin-8; G-CSF = Granulocyte colony stimulating factor; sTNFR-1 = Soluble Tumor Necrosis Factor Receptor-1; Ang-1 = Angiopoietin-1; Ang-2 = Angiopoietin-2; sVCAM-1 = Soluble Vascular Adhesion Molecule-1.

<sup>a</sup> P value for Mann-Whitney U Test
